# Supplementary material for: Strain effects on lithium ion diffusion in various crystal structures
Source: Royal Society of Chemistry journal article supplement (doi:10.1039/d3cp00742a), 2023-01-01
Supplement: d3cp00742a1.pdf [file d3cp00742a1.pdf]

# Strain Effect on Lithium Ions Diffusion in Various Crystal Structures

Bicong Liu, Jiamin Guo and Xiao Gu\*

School of Physical Science and Technology, Ningbo University, Ningbo 315211, China

Email: guxiao@nbu.edu.cn

## Supporting Information

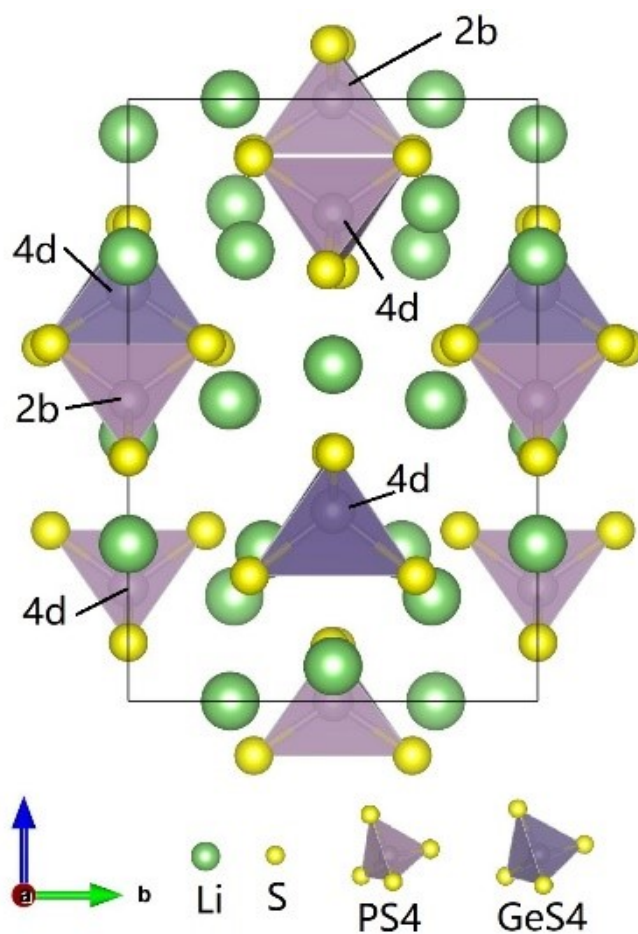

Figure S1. Schematic of the crystal structure of  $\text{Li}_{10}\text{GeP}_2\text{S}_{12}$ .

Table S1. Comparison of structural parameters of  $\text{Li}_3\text{M}$ ,  $\text{Li}_2\text{MN}$ ,  $\text{Li}_2\text{MNY}_6$  and  $\text{Li}_3\text{MY}_6$  with DFT/Exp values from previous studies, Cal indicates calculated values from our work. All of the structures are face-centered cubic with  $\alpha=\beta=\gamma=90^\circ$ . Structures of  $\text{Li}_2\text{MNY}_6$  and  $\text{Li}_3\text{MY}_6$  are from Materials project, which are theoretical results and waiting for experimental confirmation.

| $\text{Li}_3\text{M}$<br>index     | Compounds                    | a=b=c (Å) |                       | $\text{Li}_2\text{MN}$<br>index   | Compounds                  | a=b=c (Å) |                       |
|------------------------------------|------------------------------|-----------|-----------------------|-----------------------------------|----------------------------|-----------|-----------------------|
|                                    |                              | Cal       | DFT/Exp               |                                   |                            | Cal       | DFT/Exp               |
| 1                                  | $\text{Li}_3\text{Pd}$       | 6.183     | 6.187 <sup>[2]</sup>  | 1                                 | $\text{Li}_2\text{BiAu}$   | 6.668     | 6.670 <sup>[1]</sup>  |
| 2                                  | $\text{Li}_3\text{C}$        | 5.280     | 5.280 <sup>[1]</sup>  | 2                                 | $\text{Li}_2\text{AgHg}$   | 6.502     | 6.370 <sup>[1]</sup>  |
| 3                                  | $\text{Li}_3\text{Rh}$       | 6.037     | 5.960 <sup>[1]</sup>  | 3                                 | $\text{Li}_2\text{AcTl}$   | 7.361     | 7.300 <sup>[1]</sup>  |
| 4                                  | $\text{Li}_3\text{Mg}$       | 6.851     | 6.860 <sup>[1]</sup>  | 4                                 | $\text{Li}_2\text{AgBi}$   | 6.746     | 6.736 <sup>[4]</sup>  |
| 5                                  | $\text{Li}_3\text{Ca}$       | 7.489     | 7.530 <sup>[1]</sup>  | 5                                 | $\text{Li}_2\text{CaGe}$   | 6.637     | 6.570 <sup>[1]</sup>  |
| 6                                  | $\text{Li}_3\text{Ga}$       | 6.341     | 6.290 <sup>[1]</sup>  | 6                                 | $\text{Li}_2\text{AcAl}$   | 7.197     | 7.200 <sup>[1]</sup>  |
| 7                                  | $\text{Li}_3\text{Pt}$       | 6.083     | 6.010 <sup>[1]</sup>  | 7                                 | $\text{Li}_2\text{AgPb}$   | 6.682     | 6.678 <sup>[4]</sup>  |
| 8                                  | $\text{Li}_3\text{Tl}$       | 6.684     | 6.671 <sup>[2]</sup>  | 8                                 | $\text{Li}_2\text{AgAu}$   | 6.309     | 6.200 <sup>[1]</sup>  |
| 9                                  | $\text{Li}_3\text{Au}$       | 6.305     | 6.302 <sup>[2]</sup>  | 9                                 | $\text{Li}_2\text{CaAl}$   | 6.973     | 6.970 <sup>[1]</sup>  |
| 10                                 | $\text{Li}_3\text{In}$       | 6.651     | 6.590 <sup>[1]</sup>  | 10                                | $\text{Li}_2\text{AgGe}$   | 6.265     | 6.170 <sup>[1]</sup>  |
| 11                                 | $\text{Li}_3\text{Ge}$       | 6.228     | 6.160 <sup>[1]</sup>  | 11                                | $\text{Li}_2\text{CaSi}$   | 6.567     | 6.540 <sup>[1]</sup>  |
| 12                                 | $\text{Li}_3\text{Pb}$       | 6.691     | 6.687 <sup>[2]</sup>  | 12                                | $\text{Li}_2\text{AcIn}$   | 7.347     | 7.330 <sup>[1]</sup>  |
| 13                                 | $\text{Li}_3\text{Bi}$       | 6.737     | 6.708 <sup>[2]</sup>  | 13                                | $\text{Li}_2\text{AgSn}$   | 6.540     | 6.552 <sup>[4]</sup>  |
| 14                                 | $\text{Li}_3\text{Ag}$       | 6.456     | 6.400 <sup>[1]</sup>  | 14                                | $\text{Li}_2\text{AgPd}$   | 6.161     | 6.060 <sup>[1]</sup>  |
| 15                                 | $\text{Li}_3\text{Cd}$       | 6.680     | 6.610 <sup>[1]</sup>  | 15                                | $\text{Li}_2\text{CaTl}$   | 7.104     | 7.020 <sup>[1]</sup>  |
| 16                                 | $\text{Li}_3\text{Sn}$       | 6.575     | 6.572 <sup>[3]</sup>  | 16                                | $\text{Li}_2\text{CaIn}$   | 7.085     | 7.060 <sup>[1]</sup>  |
| 17                                 | $\text{Li}_3\text{Sb}$       | 6.562     | 6.573 <sup>[2]</sup>  | 17                                | $\text{Li}_2\text{CaPb}$   | 7.027     | 6.984 <sup>[5]</sup>  |
|                                    |                              |           |                       | 18                                | $\text{Li}_2\text{CaSn}$   | 6.936     | 6.935 <sup>[5]</sup>  |
|                                    |                              |           |                       | 19                                | $\text{Li}_2\text{AcPb}$   | 7.351     | 7.290 <sup>[1]</sup>  |
|                                    |                              |           |                       | 20                                | $\text{Li}_2\text{AcSn}$   | 7.238     | 7.220 <sup>[1]</sup>  |
| $\text{Li}_2\text{MNY}_6$<br>index | Compounds                    | a=b=c (Å) |                       | $\text{Li}_3\text{MY}_6$<br>index | Compounds                  | a=b=c (Å) |                       |
|                                    |                              | Cal       | DFT/Exp               |                                   |                            | Cal       | DFT/Exp               |
| 1                                  | $\text{Li}_2\text{AgAsF}_6$  | 8.813     | 8.810 <sup>[1]</sup>  | 1                                 | $\text{Li}_3\text{AlF}_6$  | 7.522     | 7.520 <sup>[1]</sup>  |
| 2                                  | $\text{Li}_2\text{AlAgF}_6$  | 8.338     | 8.340 <sup>[1]</sup>  | 2                                 | $\text{Li}_3\text{AsF}_6$  | 8.030     | 8.030 <sup>[1]</sup>  |
| 3                                  | $\text{Li}_2\text{AlCuF}_6$  | 7.949     | 7.950 <sup>[1]</sup>  | 3                                 | $\text{Li}_3\text{AuF}_6$  | 8.156     | 8.160 <sup>[1]</sup>  |
| 4                                  | $\text{Li}_2\text{AlHgF}_6$  | 8.582     | 8.580 <sup>[1]</sup>  | 4                                 | $\text{Li}_3\text{CoF}_6$  | 7.580     | 7.580 <sup>[1]</sup>  |
| 5                                  | $\text{Li}_2\text{CoAgF}_6$  | 8.285     | 8.290 <sup>[1]</sup>  | 5                                 | $\text{Li}_3\text{CrF}_6$  | 7.724     | 7.720 <sup>[1]</sup>  |
| 6                                  | $\text{Li}_2\text{CoHgF}_6$  | 8.571     | 8.570 <sup>[1]</sup>  | 6                                 | $\text{Li}_3\text{GaF}_6$  | 7.703     | 7.700 <sup>[1]</sup>  |
| 7                                  | $\text{Li}_2\text{CrCuF}_6$  | 8.079     | 8.080 <sup>[1]</sup>  | 7                                 | $\text{Li}_3\text{InCl}_6$ | 10.039    | 10.040 <sup>[1]</sup> |
| 8                                  | $\text{Li}_2\text{CuAsF}_6$  | 8.388     | 8.390 <sup>[1]</sup>  | 8                                 | $\text{Li}_3\text{InF}_6$  | 8.095     | 8.090 <sup>[1]</sup>  |
| 9                                  | $\text{Li}_2\text{CuAuF}_6$  | 8.406     | 8.410 <sup>[1]</sup>  | 9                                 | $\text{Li}_3\text{IrF}_6$  | 7.928     | 7.930 <sup>[1]</sup>  |
| 10                                 | $\text{Li}_2\text{CuIrF}_6$  | 8.246     | 8.250 <sup>[1]</sup>  | 10                                | $\text{Li}_3\text{MnF}_6$  | 7.763     | 7.760 <sup>[1]</sup>  |
| 11                                 | $\text{Li}_2\text{CuMoF}_6$  | 8.394     | 8.390 <sup>[1]</sup>  | 11                                | $\text{Li}_3\text{MoF}_6$  | 8.024     | 8.020 <sup>[1]</sup>  |
| 12                                 | $\text{Li}_2\text{CuNiF}_6$  | 7.909     | 7.910 <sup>[1]</sup>  | 12                                | $\text{Li}_3\text{NbF}_6$  | 8.091     | 8.090 <sup>[1]</sup>  |
| 13                                 | $\text{Li}_2\text{CuSbCl}_6$ | 10.215    | 10.220 <sup>[1]</sup> | 13                                | $\text{Li}_3\text{NiF}_6$  | 7.632     | 7.630 <sup>[1]</sup>  |

|    |                                     |        |                       |    |                                   |        |                       |
|----|-------------------------------------|--------|-----------------------|----|-----------------------------------|--------|-----------------------|
| 14 | Li <sub>2</sub> CuSbF <sub>6</sub>  | 8.661  | 8.660 <sup>[1]</sup>  | 14 | Li <sub>3</sub> PdF <sub>6</sub>  | 7.959  | 7.960 <sup>[1]</sup>  |
| 15 | Li <sub>2</sub> FeAgF <sub>6</sub>  | 8.357  | 8.360 <sup>[1]</sup>  | 15 | Li <sub>3</sub> RhF <sub>6</sub>  | 7.879  | 7.880 <sup>[1]</sup>  |
| 16 | Li <sub>2</sub> FeHgF <sub>6</sub>  | 8.781  | 8.780 <sup>[1]</sup>  | 16 | Li <sub>3</sub> RuF <sub>6</sub>  | 7.893  | 7.890 <sup>[1]</sup>  |
| 17 | Li <sub>2</sub> GaCuF <sub>6</sub>  | 8.111  | 8.110 <sup>[1]</sup>  | 17 | Li <sub>3</sub> SbCl <sub>6</sub> | 10.281 | 10.280 <sup>[1]</sup> |
| 18 | Li <sub>2</sub> InCuCl <sub>6</sub> | 10.018 | 10.020 <sup>[1]</sup> | 18 | Li <sub>3</sub> SbF <sub>6</sub>  | 8.331  | 8.330 <sup>[1]</sup>  |
| 19 | Li <sub>2</sub> InCuF <sub>6</sub>  | 8.446  | 8.450 <sup>[1]</sup>  | 19 | Li <sub>3</sub> TaF <sub>6</sub>  | 8.074  | 8.070 <sup>[1]</sup>  |
|    |                                     |        |                       | 20 | Li <sub>3</sub> TiF <sub>6</sub>  | 7.844  | 7.840 <sup>[1]</sup>  |
|    |                                     |        |                       | 21 | Li <sub>3</sub> TiF <sub>6</sub>  | 8.282  | 8.280 <sup>[1]</sup>  |
|    |                                     |        |                       | 22 | Li <sub>3</sub> VF <sub>6</sub>   | 7.772  | 7.770 <sup>[1]</sup>  |
|    |                                     |        |                       | 23 | Li <sub>3</sub> YF <sub>6</sub>   | 8.295  | 8.300 <sup>[1]</sup>  |
|    |                                     |        |                       | 24 | Li <sub>3</sub> ScCl <sub>6</sub> | 9.921  | 9.920 <sup>[1]</sup>  |
|    |                                     |        |                       | 25 | Li <sub>3</sub> ScF <sub>6</sub>  | 7.944  | 7.940 <sup>[1]</sup>  |

Table S2. Comparison of structural parameters of olivine, spinel, layered and lithium super ionic conductor (LISICON) with DFT/Exp values from previous studies, Cal indicates calculated values from our work.

| Type    | Compounds                                         |                         | a (Å)  | b (Å) | c (Å)  |
|---------|---------------------------------------------------|-------------------------|--------|-------|--------|
| Olivine | LiMnPO <sub>4</sub>                               | Cal                     | 10.431 | 6.095 | 4.737  |
|         |                                                   | DFT/Exp <sup>[6]</sup>  | 10.431 | 6.095 | 4.737  |
|         | LiFePO <sub>4</sub>                               | Cal                     | 10.332 | 6.010 | 4.692  |
|         |                                                   | DFT/Exp <sup>[7]</sup>  | 10.338 | 6.011 | 4.695  |
|         | LiCoPO <sub>4</sub>                               | Cal                     | 10.193 | 5.917 | 4.695  |
|         |                                                   | DFT/Exp <sup>[8]</sup>  | 10.200 | 5.920 | 4.690  |
|         | LiNiPO <sub>4</sub>                               | Cal                     | 10.028 | 5.854 | 4.676  |
|         |                                                   | DFT/Exp <sup>[6]</sup>  | 10.028 | 5.854 | 4.676  |
| Layered | LiCoO <sub>2</sub>                                | Cal                     | 2.843  | 2.843 | 14.146 |
|         |                                                   | DFT/Exp <sup>[9]</sup>  | 2.816  | 2.816 | 14.054 |
|         | LiNiO <sub>2</sub>                                | Cal                     | 2.905  | 2.905 | 14.402 |
|         |                                                   | DFT/Exp <sup>[10]</sup> | 2.891  | 2.891 | 14.301 |
|         | LiMnO <sub>2</sub>                                | Cal                     | 3.022  | 3.022 | 14.650 |
|         |                                                   | DFT/Exp <sup>[11]</sup> | 3.005  | 3.005 | 14.739 |
| Spinel  | LiMn <sub>2</sub> O <sub>4</sub>                  | Cal                     | 8.422  | 8.422 | 8.422  |
|         |                                                   | DFT/Exp <sup>[12]</sup> | 8.433  | 8.433 | 8.433  |
|         | LiTi <sub>2</sub> O <sub>4</sub>                  | Cal                     | 8.391  | 8.391 | 8.391  |
|         |                                                   | DFT/Exp <sup>[13]</sup> | 8.391  | 8.391 | 9.391  |
|         | LiCo <sub>2</sub> O <sub>4</sub>                  | Cal                     | 8.197  | 8.197 | 8.197  |
|         |                                                   | DFT/Exp <sup>[14]</sup> | 8.146  | 8.146 | 8.146  |
| LISICON | Li <sub>10</sub> GeP <sub>2</sub> S <sub>12</sub> | Cal                     | 8.740  | 8.740 | 12.862 |
|         |                                                   | DFT/Exp <sup>[15]</sup> | 8.561  | 8.847 | 12.929 |
|         | Li <sub>10</sub> SnP <sub>2</sub> S <sub>12</sub> | Cal                     | 8.693  | 8.969 | 12.990 |
|         |                                                   | DFT/Exp <sup>[15]</sup> | 8.666  | 8.950 | 13.133 |

|                                            |                         |       |       |        |
|--------------------------------------------|-------------------------|-------|-------|--------|
| $\text{Li}_{10}\text{SiP}_2\text{S}_{12}$  | Cal                     | 8.716 | 8.850 | 12.716 |
|                                            | DFT/Exp <sup>[15]</sup> | 8.566 | 8.848 | 12.920 |
| $\text{Li}_{10}\text{GeP}_2\text{Se}_{12}$ | Cal                     | 9.135 | 9.334 | 13.500 |
|                                            | DFT/Exp <sup>[15]</sup> | 9.054 | 9.400 | 13.690 |

Table S3. Variation of the energy barriers as a function of the isotropic strains for  $\text{Li}_3\text{M}$ ,  $\text{Li}_2\text{MN}$ ,  $\text{Li}_2\text{MNY}_6$ , and  $\text{Li}_3\text{MY}_6$  and the structure corresponding to each color in Figures 6,7,8. The strain variation of  $\text{Li}_2\text{MNY}_6$  is -7% to 10%.

| Type                   | Compounds                | Strain                                         |       |       |                      |       |         | Color      |
|------------------------|--------------------------|------------------------------------------------|-------|-------|----------------------|-------|---------|------------|
|                        |                          | -10%<br>( $\text{Li}_2\text{MNY}_6$<br>is -7%) | -5%   | 0     |                      | 5%    | 10%     |            |
|                        |                          |                                                |       | Cal   | DFT/<br>Exp          |       |         |            |
| $\text{Li}_3\text{M}$  | $\text{Li}_3\text{Ag}$   | 1.207                                          | 0.921 | 0.696 | --                   | 0.519 | 0.256   | Red        |
|                        | $\text{Li}_3\text{Au}$   | 1.072                                          | 0.896 | 0.534 | --                   | 0.381 | 0.232   | OrangeRed  |
|                        | $\text{Li}_3\text{Bi}$   | 1.370                                          | 0.998 | 0.692 | --                   | 0.585 | 0.512   | Brown      |
|                        | $\text{Li}_3\text{C}$    | 0.747                                          | 0.514 | 0.386 | --                   | 0.355 | 0.310   | Yellow     |
|                        | $\text{Li}_3\text{Ca}$   | 0.702                                          | 0.578 | 0.476 | --                   | 0.434 | 0.193   | Olive      |
|                        | $\text{Li}_3\text{Ga}$   | 0.793                                          | 0.646 | 0.477 | --                   | 0.310 | 0.144   | LightGreen |
|                        | $\text{Li}_3\text{Ge}$   | 1.166                                          | 0.902 | 0.632 | --                   | 0.397 | 0.053   | Green      |
|                        | $\text{Li}_3\text{In}$   | 0.908                                          | 0.765 | 0.598 | --                   | 0.426 | 0.271   | LimeGreen  |
|                        | $\text{Li}_3\text{Mg}$   | 1.089                                          | 0.874 | 0.467 | 0.49 <sup>[16]</sup> | 0.406 | 0.324   | DarkGreen  |
|                        | $\text{Li}_3\text{Pb}$   | 1.170                                          | 0.924 | 0.690 | --                   | 0.474 | 0.274   | RoyalBlue  |
|                        | $\text{Li}_3\text{Pd}$   | 0.686                                          | 0.523 | 0.354 | --                   | 0.278 | 0.001   | DarkBlue   |
|                        | $\text{Li}_3\text{Pt}$   | 0.886                                          | 0.711 | 0.484 | --                   | 0.389 | 0.287   | Cyan       |
|                        | $\text{Li}_3\text{Rh}$   | 0.811                                          | 0.565 | 0.410 | --                   | 0.247 | 0.096   | Blue       |
|                        | $\text{Li}_3\text{Sb}$   | 1.526                                          | 1.108 | 0.771 | --                   | 0.636 | 0.570   | LightBlue  |
|                        | $\text{Li}_3\text{Sn}$   | 1.251                                          | 1.015 | 0.761 | --                   | 0.510 | 0.238   | Magenta    |
|                        | $\text{Li}_3\text{Tl}$   | 0.863                                          | 0.688 | 0.516 | --                   | 0.359 | 0.220   | Purple     |
| $\text{Li}_3\text{Cd}$ | 1.162                    | 0.915                                          | 0.732 | --    | 0.520                | 0.377 | DarkRed |            |
| $\text{Li}_2\text{MN}$ | $\text{Li}_2\text{AcAl}$ | 0.972                                          | 0.839 | 0.638 | --                   | 0.363 | 0.020   | Red        |
|                        | $\text{Li}_2\text{AcIn}$ | 1.086                                          | 0.949 | 0.716 | --                   | 0.419 | 0.197   | OrangeRed  |
|                        | $\text{Li}_2\text{AcPb}$ | 1.654                                          | 1.321 | 0.963 | --                   | 0.611 | 0.305   | Brown      |
|                        | $\text{Li}_2\text{AcSn}$ | 1.710                                          | 1.390 | 1.026 | --                   | 0.648 | 0.329   | Yellow     |
|                        | $\text{Li}_2\text{AcTl}$ | 1.016                                          | 0.840 | 0.571 | --                   | 0.271 | 0.126   | Olive      |
|                        | $\text{Li}_2\text{AgAu}$ | 1.791                                          | 1.146 | 0.655 | --                   | 0.557 | 0.166   | LightGreen |
|                        | $\text{Li}_2\text{AgBi}$ | 1.610                                          | 1.042 | 0.604 | --                   | 0.480 | 0.248   | Green      |
|                        | $\text{Li}_2\text{AgGe}$ | 1.857                                          | 1.183 | 0.673 | --                   | 0.565 | 0.195   | LimeGreen  |
|                        | $\text{Li}_2\text{AgHg}$ | 1.584                                          | 1.000 | 0.566 | --                   | 0.484 | 0.025   | DarkGreen  |
|                        | $\text{Li}_2\text{AgPb}$ | 1.677                                          | 1.087 | 0.648 | --                   | 0.500 | 0.036   | RoyalBlue  |

|                                     |                                     |       |       |       |       |       |          |            |
|-------------------------------------|-------------------------------------|-------|-------|-------|-------|-------|----------|------------|
|                                     | Li <sub>2</sub> AgPd                | 1.826 | 1.240 | 0.766 | --    | 0.368 | 0.269    | DarkBlue   |
|                                     | Li <sub>2</sub> AgSn                | 1.940 | 1.260 | 0.746 | --    | 0.627 | 0.031    | Cyan       |
|                                     | Li <sub>2</sub> BiAu                | 1.728 | 1.034 | 0.499 | --    | 0.427 | 0.212    | Blue       |
|                                     | Li <sub>2</sub> CaAl                | 1.370 | 0.923 | 0.672 | --    | 0.483 | 0.200    | LightBlue  |
|                                     | Li <sub>2</sub> CaGe                | 1.341 | 0.912 | 0.627 | --    | 0.399 | 0.135    | Magenta    |
|                                     | Li <sub>2</sub> CaIn                | 1.250 | 1.100 | 0.812 | --    | 0.536 | 0.325    | Purple     |
|                                     | Li <sub>2</sub> CaPb                | 1.544 | 1.270 | 0.899 | --    | 0.567 | 0.319    | DarkRed    |
|                                     | Li <sub>2</sub> CaSi                | 1.332 | 0.894 | 0.706 | --    | 0.459 | 0.161    | Plum       |
|                                     | Li <sub>2</sub> CaSn                | 1.624 | 1.332 | 0.962 | --    | 0.641 | 0.321    | DarkPink   |
|                                     | Li <sub>2</sub> CaTl                | 1.123 | 0.938 | 0.803 | --    | 0.413 | 0.232    | Pink       |
| Li <sub>2</sub> MNY<br>6            | Li <sub>2</sub> AgAsF <sub>6</sub>  | 0.705 | 0.245 | 0.377 | --    | 0.574 | 0.862    | Red        |
|                                     | Li <sub>2</sub> AlAgF <sub>6</sub>  | 0.302 | 0.293 | 0.541 | --    | 0.624 | 0.761    | OrangeRed  |
|                                     | Li <sub>2</sub> AlCuF <sub>6</sub>  | 0.491 | 0.025 | 0.294 | --    | 0.459 | 0.754    | Brown      |
|                                     | Li <sub>2</sub> AlHgF <sub>6</sub>  | 0.668 | 0.433 | 0.653 | --    | 0.708 | 0.769    | Yellow     |
|                                     | Li <sub>2</sub> CoAgF <sub>6</sub>  | 0.407 | 0.248 | 0.516 | --    | 0.569 | 0.649    | Olive      |
|                                     | Li <sub>2</sub> CoHgF <sub>6</sub>  | 0.634 | 0.085 | 0.427 | --    | 0.520 | 0.554    | LightGreen |
|                                     | Li <sub>2</sub> CrCuF <sub>6</sub>  | 0.533 | 0.134 | 0.301 | --    | 0.460 | 0.628    | Green      |
|                                     | Li <sub>2</sub> CuAsF <sub>6</sub>  | 0.626 | 0.293 | 0.330 | --    | 0.580 | 0.730    | LimeGreen  |
|                                     | Li <sub>2</sub> CuAuF <sub>6</sub>  | 0.701 | 0.042 | 0.546 | --    | 0.769 | 0.909    | DarkGreen  |
|                                     | Li <sub>2</sub> CuIrF <sub>6</sub>  | 0.590 | 0.235 | 0.344 | --    | 0.532 | 0.738    | RoyalBlue  |
|                                     | Li <sub>2</sub> CuMoF <sub>6</sub>  | 0.622 | 0.061 | 0.373 | --    | 0.511 | 0.806    | DarkBlue   |
|                                     | Li <sub>2</sub> CuNiF <sub>6</sub>  | 0.445 | 0.004 | 0.298 | --    | 0.451 | 0.656    | Cyan       |
|                                     | Li <sub>2</sub> CuSbCl <sub>6</sub> | 0.543 | 0.451 | 0.656 | --    | 0.763 | 0.807    | Blue       |
|                                     | Li <sub>2</sub> CuSbF <sub>6</sub>  | 0.213 | 0.072 | 0.213 | --    | 0.474 | 0.747    | LightBlue  |
|                                     | Li <sub>2</sub> CuSbF <sub>6</sub>  | 0.413 | 0.279 | 0.546 | --    | 0.656 | 0.843    | Magenta    |
|                                     | Li <sub>2</sub> FeAgF <sub>6</sub>  | 0.530 | 0.409 | 0.602 | --    | 0.723 | 0.932    | Purple     |
|                                     | Li <sub>2</sub> FeHgF <sub>6</sub>  | 0.724 | 0.069 | 0.321 | --    | 0.507 | 0.821    | DarkRed    |
|                                     | Li <sub>2</sub> GaCuF <sub>6</sub>  | 0.356 | 0.303 | 0.561 | --    | 0.717 | 0.954    | Plum       |
| Li <sub>2</sub> InCuCl <sub>6</sub> | 0.623                               | 0.280 | 0.366 | --    | 0.635 | 0.854 | DarkPink |            |
| Li <sub>2</sub> InCuF <sub>6</sub>  |                                     |       |       |       |       |       |          |            |
| Li <sub>3</sub> MY <sub>6</sub>     | Li <sub>3</sub> AlF <sub>6</sub>    | 0.760 | 0.183 | 0.203 | --    | 0.422 | 0.967    | Red        |
|                                     | Li <sub>3</sub> AsF <sub>6</sub>    | 0.604 | 0.016 | 0.246 | --    | 0.273 | 0.512    | OrangeRed  |
|                                     | Li <sub>3</sub> AuF <sub>6</sub>    | 0.463 | 0.026 | 0.302 | --    | 0.383 | 0.508    | Brown      |
|                                     | Li <sub>3</sub> CoF <sub>6</sub>    | 0.488 | 0.109 | 0.143 | --    | 0.285 | 0.358    | Yellow     |
|                                     | Li <sub>3</sub> CrF <sub>6</sub>    | 0.341 | 0.001 | 0.212 | --    | 0.284 | 0.420    | Olive      |
|                                     | Li <sub>3</sub> GaF <sub>6</sub>    | 0.624 | 0.153 | 0.273 | --    | 0.488 | 0.564    | LightGreen |
|                                     | Li <sub>3</sub> InCl <sub>6</sub>   | 0.023 | 0.420 | 0.669 | --    | 0.781 | 1.078    | Green      |
|                                     | Li <sub>3</sub> InF <sub>6</sub>    | 0.806 | 0.186 | 0.347 | --    | 0.636 | 0.733    | LimeGreen  |
|                                     | Li <sub>3</sub> IrF <sub>6</sub>    | 0.419 | 0.134 | 0.297 | --    | 0.367 | 0.658    | DarkGreen  |
|                                     | Li <sub>3</sub> MnF <sub>6</sub>    | 0.285 | 0.017 | 0.192 | --    | 0.252 | 0.396    | RoyalBlue  |
|                                     | Li <sub>3</sub> MoF <sub>6</sub>    | 0.252 | 0.187 | 0.335 | --    | 0.352 | 0.512    | DarkBlue   |
|                                     | Li <sub>3</sub> NbF <sub>6</sub>    | 0.316 | 0.132 | 0.337 | --    | 0.417 | 0.609    | Cyan       |
|                                     | Li <sub>3</sub> NiF <sub>6</sub>    | 0.365 | 0.047 | 0.163 | --    | 0.261 | 0.364    | Blue       |
|                                     | Li <sub>3</sub> PdF <sub>6</sub>    | 0.160 | 0.111 | 0.270 | --    | 0.311 | 0.548    | LightBlue  |

|  |                                   |       |       |       |    |       |       |             |
|--|-----------------------------------|-------|-------|-------|----|-------|-------|-------------|
|  | Li <sub>3</sub> RhF <sub>6</sub>  | 0.231 | 0.087 | 0.284 | -- | 0.388 | 0.458 | Magenta     |
|  | Li <sub>3</sub> RuF <sub>6</sub>  | 0.673 | 0.168 | 0.314 | -- | 0.380 | 0.777 | Purple      |
|  | Li <sub>3</sub> SbCl <sub>6</sub> | 0.263 | 0.501 | 0.637 | -- | 0.690 | 0.844 | DarkRed     |
|  | Li <sub>3</sub> SbF <sub>6</sub>  | 0.525 | 0.198 | 0.290 | -- | 0.409 | 0.530 | Pink        |
|  | Li <sub>3</sub> TaF <sub>6</sub>  | 0.752 | 0.094 | 0.193 | -- | 0.248 | 0.415 | LightPurple |
|  | Li <sub>3</sub> TiF <sub>6</sub>  | 0.462 | 0.028 | 0.221 | -- | 0.306 | 0.627 | DarkPink    |
|  | Li <sub>3</sub> TiF <sub>6</sub>  | 0.473 | 0.190 | 0.275 | -- | 0.648 | 0.754 | Plum        |
|  | Li <sub>3</sub> VF <sub>6</sub>   | 0.368 | 0.009 | 0.214 | -- | 0.273 | 0.515 | Orange      |
|  | Li <sub>3</sub> YF <sub>6</sub>   | 0.882 | 0.079 | 0.439 | -- | 0.716 | 0.871 | DarkCyan    |
|  | Li <sub>3</sub> ScCl <sub>6</sub> | 0.245 | 0.454 | 0.674 | -- | 0.905 | 1.135 | Black       |
|  | Li <sub>3</sub> ScF <sub>6</sub>  | 0.515 | 0.151 | 0.355 | -- | 0.612 | 0.752 | Gray        |

Table S4. Variation of the energy barriers as a function of the isotropic strains for Olivine, spinel, layered and LISICON structures. And the energy barrier in the strain-free case are compared with DFT/Exp values from previous studies. The strain variation of spinel is -10% to 10%.

| Type    | Compounds                                          | Strain                     |       |       |                       |       |       |
|---------|----------------------------------------------------|----------------------------|-------|-------|-----------------------|-------|-------|
|         |                                                    | -7%<br>(spinel<br>is -10%) | -5%   | 0     |                       | 5%    | 10%   |
|         |                                                    |                            |       | Cal   | DFT/Exp               |       |       |
| Olivine | LiFePO <sub>4</sub>                                | 0.499                      | 0.431 | 0.331 | 0.32 <sup>[17]</sup>  | 0.245 | 0.023 |
|         | LiNiPO <sub>4</sub>                                | 0.648                      | 0.534 | 0.355 | 0.36 <sup>[18]</sup>  | 0.253 | 0.068 |
|         | LiCoPO <sub>4</sub>                                | 0.554                      | 0.449 | 0.320 | 0.36 <sup>[19]</sup>  | 0.237 | 0.168 |
|         | LiMnPO <sub>4</sub>                                | 0.501                      | 0.419 | 0.312 | 0.304 <sup>[20]</sup> | 0.249 | 0.067 |
| Spinel  | LiMn <sub>2</sub> O <sub>4</sub>                   | 0.302                      | 0.397 | 0.418 | 0.40 <sup>[14]</sup>  | 0.608 | 0.870 |
|         | LiTi <sub>2</sub> O <sub>4</sub>                   | 0.265                      | 0.305 | 0.356 | 0.33 <sup>[13]</sup>  | 0.365 | 0.730 |
|         | LiCo <sub>2</sub> O <sub>4</sub>                   | 0.247                      | 0.297 | 0.337 | 0.30 <sup>[14]</sup>  | 0.345 | 0.353 |
| Layered | LiCoO <sub>2</sub> -ODH                            | 0.907                      | 0.463 | 0.379 | 0.39 <sup>[21]</sup>  | 0.352 | 0.304 |
|         | LiCoO <sub>2</sub> -TSH                            | 1.124                      | 0.578 | 0.201 | 0.19 <sup>[22]</sup>  | 0.116 | 0.012 |
|         | LiNiO <sub>2</sub> -ODH                            | 0.806                      | 0.373 | 0.237 | 0.59 <sup>[23]</sup>  | 0.164 | 0.072 |
|         | LiNiO <sub>2</sub> -TSH                            | 1.030                      | 0.752 | 0.114 | --                    | 0.089 | 0.047 |
|         | LiMnO <sub>2</sub> -ODH                            | 0.553                      | 0.355 | 0.317 | 0.50 <sup>[24]</sup>  | 0.269 | 0.169 |
|         | LiMnO <sub>2</sub> -TSH                            | 1.126                      | 0.780 | 0.191 | 0.35 <sup>[24]</sup>  | 0.070 | 0.007 |
| LISICON | Li <sub>10</sub> GeP <sub>2</sub> S <sub>12</sub>  | 0.310                      | 0.288 | 0.227 | 0.21 <sup>[15]</sup>  | 0.211 | 0.074 |
|         | Li <sub>10</sub> SnP <sub>2</sub> S <sub>12</sub>  | 0.346                      | 0.296 | 0.247 | 0.24 <sup>[15]</sup>  | 0.216 | 0.137 |
|         | Li <sub>10</sub> SiP <sub>2</sub> S <sub>12</sub>  | 0.320                      | 0.273 | 0.234 | 0.20 <sup>[15]</sup>  | 0.186 | 0.095 |
|         | Li <sub>10</sub> GeP <sub>2</sub> Se <sub>12</sub> | 0.352                      | 0.315 | 0.275 | 0.19 <sup>[15]</sup>  | 0.236 | 0.103 |

## References

- [1] Jain A; Ong, S. P; Hautier G; Chen, W; Richards, W.D; Dacek, S; Cholia, S; Gunter, D; Skinner, D; Ceder, G; Persson, K.A, Commentary: The materials project: a materials genome approach to accelerating materials innovation[J]. *APL Materials*, 2013, 1(1): 011-002.
- [2] Ilyushin, G.D., Intermetallic compounds  $\text{Li}_k\text{Mn}$  (M = Ag, Au, Pt, Pd, Ir, Rh): Geometrical and topological analysis, tetrahedral cluster precursors, and self-assembly of crystal structures. *Crystallogr. Rep.* **2020**, 65, 202-210.
- [3] Thackeray, M.M.; Vaughey, J.T.; Johnson, C.S.; Kropf, A.J.; Benedek, R.; Fransson, L.M.L.; Edstrom, K., Structural considerations of intermetallic electrodes for lithium batteries. *J. Power Sources* **2003**, 113 (1), 124-130.
- [4] Hermann, P.; Alarich, W.; Helmut, W., The crystal structure of the ternary intermetallic phases  $\text{Li}_2\text{EX}$  (E=Cu, Ag, Au; X=Al, Ga, In, Tl, Sn, Pb, Sb, Bi). *Int. J. Mater. Res.* **1968**, 59 (1), 47-58.
- [5] Stoiber, D.; Bobnar, M.; Höhn, P.; Niewa R., Lithium alkaline earth tetrelides of the type  $\text{Li}_2\text{AeTt}$  (Ae=Ca, Ba, Tt=Si, Ge, Sn, Pb): synthesis, crystal structures and physical properties. *Zeitschrift für Naturforschung B* **2017**, 72 (11), 847-853.
- [6] García-Moreno, O.; Alvarez-Vega, M.; García-Alvarado, F.; García-Jaca, J.; Gallardo-Amores, J. M.; Sanjuán, M. L.; Amador, U., Influence of the structure on the electrochemical performance of lithium transition metal phosphates as cathodic materials in rechargeable lithium batteries: A new high-pressure form of  $\text{LiMPO}_4$  (M=Fe and Ni). *Chem. Mater.* **2001**, 13 (5), 1570.
- [7] Rouse, G.; Rodriguez-Carvajal, J.; Patoux, S.; Masquelier, C., Magnetic structures of the triphylite  $\text{LiFePO}_4$  and of its delithiated form  $\text{FePO}_4$ . *Chem. Mater.* **2003**, 15 (21), 4082-4090.
- [8] Kubel, F., Crystal structure of lithium cobalt double orthophosphate,  $\text{LiCoPO}_4$ . *Zeitschrift für Kristallographie-Crystalline Materials* **1994**, 209, 755.
- [9] Takahashia, Y.; Kijimaa, N.; Dokkob, K.; Nishizawab, M.; Uchidab, I.; Akimoto, J., Structure and electron density analysis of electrochemically and chemically delithiated  $\text{LiCoO}_2$  single crystals. *J. Solid State Chem.* **2007**, 180 (1), 313-321.
- [10] Palacín, M. R.; Larcher, D.; Audemer, A.; Sac-Épée, N.; Amatucci, G. G.; Tarascon, J.-M., Low-temperature synthesis of  $\text{LiNiO}_2$ : reaction mechanism, stability, and electrochemical properties. *J. Electrochem. Soc.* **1997**, 144, 4226.
- [11] Huang, Z. F.; Meng, X.; Wang, C. Z.; Sun, Y.; Chen, G., First-principles calculations on the Jahn–Teller distortion in layered  $\text{LiMnO}_2$ . *Journal of Power Sources* **2006**, 158 (2), 1394-1400.
- [12] Masanobu, N; Mayumi, K; Masataka, W; First-principles study of lithium ion migration in lithium transition metal oxides with spinel structure. *Phys. Chem. Chem. Phys.* **2012**, 14, 13963–13970.
- [13] Wang, J.; Liu, L.; Zhang, W.; Dang, F.; Zhang, S.; Du, Y., First-principles studies on cation point defects in  $\text{LiTi}_2\text{O}_4$ . *Physica B: Condensed Matter.* **2022**, 639 (15), 413959.
- [14] Nakayama, M.; Kaneko, M.; Wakihara, M., First-principles study of lithium ion migration in lithium transition metal oxides with spinel structure. *Phys. Chem. Chem. Phys.* **2012**, 14 (40), 13963-13970.
- [15] Ong, S. P.; Mo, Y.; Richards, W. D.; Miara, L.; Lee, H. S.; Ceder, G., Phase stability, electrochemical stability and ionic conductivity of the  $\text{Li}_{10\pm 1}\text{MP}_2\text{X}_{12}$  (M=Ge, Si, Sn, Al or P,

- and X=O, S or Se) family of superionic conductors. *Energy Environ. Sci.* **2013**, *6* (1), 148-156.
- [16] Zhang, H.; Ju, S.; Xia, G.; Yu, X.; Identifying the positive role of lithium hydride in stabilizing Li metal anodes. *Sci. Adv.* **2022**, *8* (3), eabl8245.
- [17] Fisher, C. A. J.; Hart Prieto, V. M.; Saiful Islam, M., Lithium battery materials LiMPO<sub>4</sub> (M=Mn, Fe, Co, and Ni): Insights into defect association, transport mechanisms, and doping behavior. *Chem. Mater.* **2008**, *20* (18), 5907-5915.
- [18] Xu, G.; Zhong, K.; Zhang, J.-M.; Huang, Z., First-principles investigation of the electronic and Li-ion diffusion properties of LiFePO<sub>4</sub> by sulfur surface modification. *J. Appl. Phys.* **2014**, *116* (6) 063703.
- [19] Gao, Y.; Huang, J.; Liu, Y.; Chen, S., Unexpected role of electronic coupling between host redox centers in transport kinetics of lithium ions in olivine phosphate materials. *Chem. Sci.* **2021**, *13* (1), 257-262.
- [20] Morgan D.; A. Van der Ven, A.; Ceder. G., Li conductivity in Li<sub>x</sub>MPO<sub>4</sub> (M = Mn, Fe, Co, Ni) olivine materials. *Electrochem. Solid-State Lett.* **2004**, *7* (2), A30-A32.
- [21] Ning, F.; Li, S.; Xu, B.; Ouyang, C., Strain tuned Li diffusion in LiCoO<sub>2</sub> material for Li ion batteries: A first principles study. *Solid State Ionics* **2014**, *263*, 46-48.
- [22] Li, J.-J.; Dai, Y.; Zheng, J.-C., Strain engineering of ion migration in LiCoO<sub>2</sub>. *Frontiers of Physics* **2021**, *17* (1) 13503-13508.
- [23] Nakamura, K.; Ohno, H.; Okamura, K.; Michihiro, Y., On the diffusion of Li defects in LiCoO<sub>2</sub> and LiNiO<sub>2</sub>. *Solid State Ionics* **2000**, *135*, 143-147.
- [24] Kong, F.; Longo, R. C.; Park, M.-S.; Yoon, J.; Yeon, D.-H.; Park, J.-H.; Wang, W.-H.; Kc, S.; Doo, S.-G.; Cho, K., Ab initio study of doping effects on LiMnO<sub>2</sub> and Li<sub>2</sub>MnO<sub>3</sub> cathode materials for Li-ion batteries. *J. Mater. Chem. A* **2015**, *3* (16), 8489-8500.
